# Supplementary material for: Vitamin A Promotes the Fusion of Autophagolysosomes and Prevents Excessive Inflammasome Activation in Dextran Sulfate Sodium-Induced Colitis
Source: MDPI journal article supplement (doi:10.3390/ijms24108684), 2023-05-12
Supplement: s1 [file s1]

## SUPPLEMENTAL INFORMATION

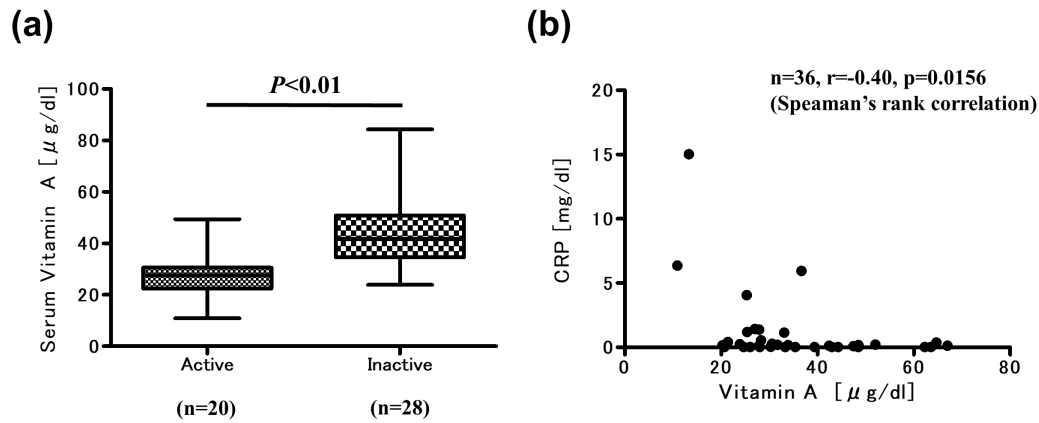

**Figure S1. Serum vitamin A levels of patients with CD are related to disease activity and CRP.**

(A) Serum vitamin A levels of active CD (Crohn's disease activity index (CDAI)  $<150$ ,  $n=20$ ) and inactive CD (CDAI  $\geq 150$ ,  $n=28$ ) patients, (B) correlation between serum vitamin A levels and C-reactive protein (CRP) of CD patients ( $n=36$ ). In (A), data are presented as mean  $\pm$  SEM ( $n > 2$  independent experiments). Unpaired- $t$  test was used for statistical analysis ( $*P < 0.05$ ,  $**P < 0.01$ ). In (B), data was analyzed with Speaman's rank correlation.

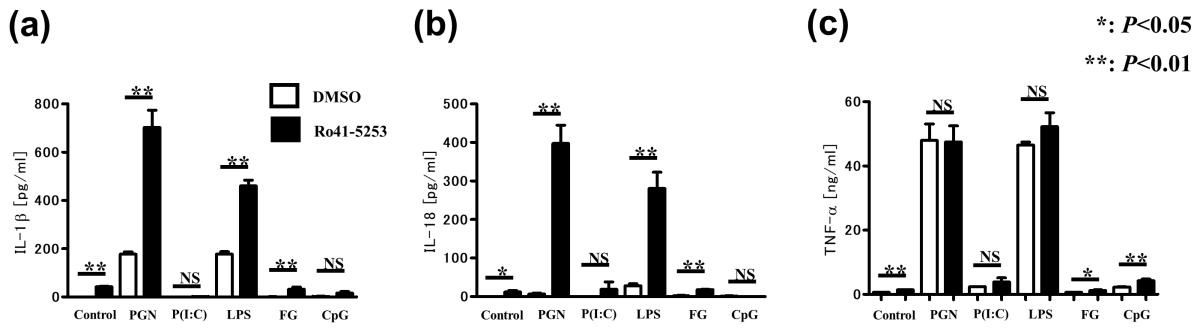

**Figure S2. RAW 264.7 cells pretreated with RAR antagonist produce increased levels of IL-1β and IL-18.** (A, B, C) Effect of a RAR antagonist (Ro41-5253) on inflammatory cytokine production of murine macrophage (RAW264.7) cells treated with TLR ligands. RAW264.7 cells were cultured in the presence of TLR ligands (PGN, Poly(I:C), LPS, Flagellin, CpG) for 24 h, pre-treated with or without a RAR antagonist (Ro41-5253) for 1 h. Inflammatory cytokines (IL-1β, IL-18, TNF-α) were measured in culture supernatants by ELISA. (A) IL-1β production (n=5), (B) IL-18 production (n=5), (C) TNF-α production (n=5). In (A, B, C), data are presented as mean ± SEM (n>2 independent experiments). Unpaired-*t* test was used for statistical analysis (\**P*<0.05, \*\**P*<0.01).

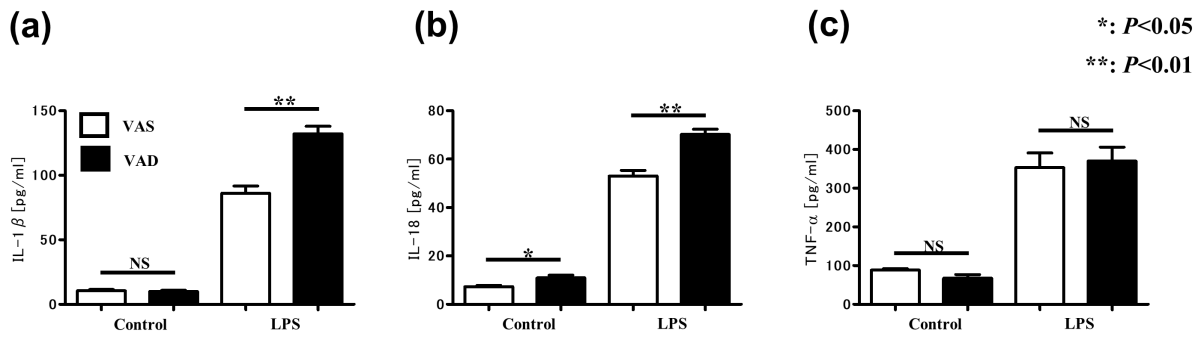

**Figure S3. LPS-treated VAD CD11b<sup>+</sup> splenic cells exhibit markedly increased levels of IL-1β and IL-18.** (A, B, C) Inflammatory cytokine production of CD11b<sup>+</sup> splenic cells from VAS and VAD B6 mice treated with LPS. Inflammatory cytokines (IL-1β, IL-18, TNF-α) were measured in culture supernatants by ELISA. (A) IL-1β production (n=5), (B) IL-18 production (n=5), (C) TNF-α production (n=5). In (A, B, C), data are presented as mean ± SEM (n>2 independent experiments). Unpaired-*t* test was used for statistical analysis (\**P*<0.05, \*\**P*<0.01).

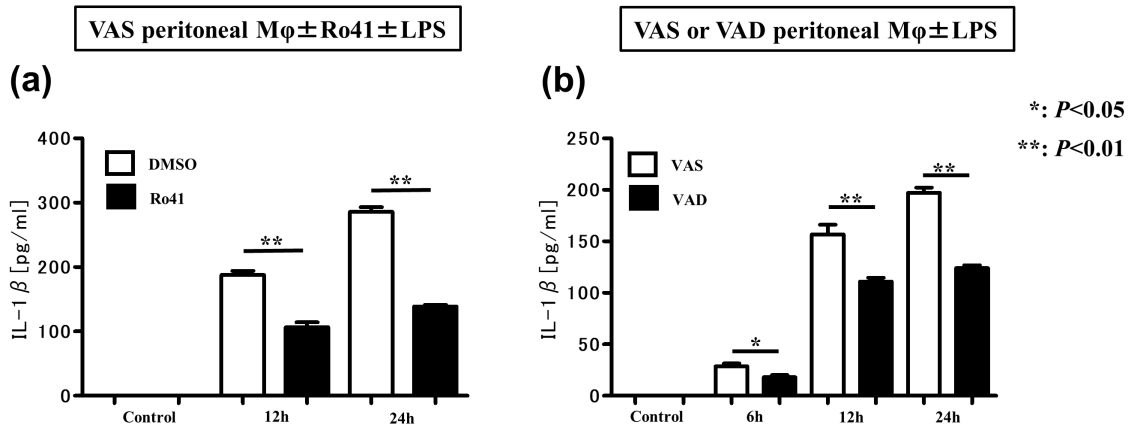

**Figure S4. LPS-treated VAD B6 peritoneal macrophages produce markedly reduced levels of IL-1 $\beta$  and IL-18.** (A, B) IL-1 $\beta$  production of PECs, (A) IL-1 $\beta$  production of PECs collected from VAS and VAD mice after LPS treatment (n=5), (B) IL-1 $\beta$  production of PECs collected from VAS mice pre-treated with or without a RAR antagonist (Ro41-5253) after LPS treatment (n=5). IL-1 $\beta$  were measured in culture supernatants by ELISA. In (A, B), data are presented as mean  $\pm$  SEM (n>2 independent experiments). Unpaired-*t* test was used for statistical analysis (\**P*<0.05, \*\**P*<0.01).

## **SUPPLEMENTAL EXPERIMENTAL PROCEDURES**

### **Preparation of CD11b<sup>+</sup> splenic cells**

Single-cell suspensions from spleens of mice were prepared as previously described [89]. Cells were purified by AutoMACS with CD11b microbeads (Miltenyi Biotec Inc., Bergish Gladbach, Germany). More than 95% of the recovered cells were CD11b<sup>+</sup>. Splenic CD11b<sup>+</sup> cells were resuspended in RPMI 1640 medium supplemented with 10% FBS and seeded on 24-well culture plates at  $1 \times 10^6$  cells/well. Cells were treated with 10  $\mu$ g/ml LPS.

### **Preparation of peritoneal exudate cells (PECs)**

Mice were injected with 3 ml of 4% thioglycolate (Eiken Chemical Co., Ltd., Tokyo, Japan) intraperitoneally. After 4 days, mice were injected intraperitoneally with 6 ml cold PBS and peritoneal exudate cells (PECs) were harvested. PECs were seeded on 24-well culture plate at  $1 \times 10^6$  cells/well in RPMI 1640 medium (Thermo Fisher Scientific) supplemented with 0.1 mg/ml recombinant macrophage colony-stimulating factor (PeproTech, Rocky Hill, USA) and 10% FBS and incubated overnight [90]. Cells were then treated with 10 mM Ro41-5253 or DMSO as control group for 1 h and treated simultaneously with 10  $\mu$ g/ml LPS.
